# Supplementary material for: Inhibition of amyloid fibril formation of β-lactoglobulin by natural and synthetic curcuminoids
Source: Royal Society of Chemistry journal article supplement (doi:10.1039/c8nj03194k), 2018-01-01
Supplement: c8nj03194k1.pdf [file c8nj03194k1.pdf]

## Supporting information

### Inhibition of amyloid fibril formation of $\beta$ -lactoglobulin by the natural and synthetic curcuminoids

Sanhita Maity,<sup>a</sup> Sampa Pal,<sup>a</sup> Subrata Sardar,<sup>a</sup> Nayim Sepay,<sup>a</sup> Hasan Parvej,<sup>a</sup> Shahnaz Begum,<sup>a</sup> Ramkrishna Dalui,<sup>a</sup> Niloy Das,<sup>b</sup> Anirban Pradhan<sup>c</sup> and Umesh Chandra Halder<sup>\*a</sup>

|                                                      |           |
|------------------------------------------------------|-----------|
| <b>1. Synthesis of curcumin derivatives.....</b>     | <b>S2</b> |
| <b>2. Synthesis of diacetyl curcumin (DAC) .....</b> | <b>S2</b> |
| <b>3. <sup>1</sup>H-NMR of DAC.....</b>              | <b>S3</b> |
| <b>4. <sup>13</sup>C-NMR of DAC.....</b>             | <b>S3</b> |
| <b>5. ESI-MS of DAC.....</b>                         | <b>S4</b> |
| <b>6. CD- Calculations (Table-1).....</b>            | <b>S5</b> |
| <b>7 References.....</b>                             | <b>S5</b> |

## 1. Synthesis of curcumin derivatives

IOC, PY derivatives were synthesized and characterized according to S. Maity *et al.* [1]. The derivative DAC was also synthesized in the lab. These curcumin derivatives were further characterized by  $^1\text{H-NMR}$ ,  $^{13}\text{C-NMR}$  and ESI-MS.

## 2. Synthesis of diacetyl curcumin (DAC)

400 mg of purified curcumin (1.09 mmol) was dissolved in 100 ml of  $\text{CH}_2\text{Cl}_2$  containing 1 ml of pyridine and 1 ml of acetic anhydride. The solution was kept at reflux under stirring for 7 hours and then was neutralized with 0.1 N HCl and was extracted with  $\text{CH}_2\text{Cl}_2$ . The residue obtained after solvent removal was dissolved in ethyl acetate and washed with water. The organic portion was collected, dried over anhydrous sodium sulfate and concentrated under vacuum. Crude product was purified by column chromatography on a silica column (100-200 mesh) to afford diacetyl curcumin (DAC). The solvent system used was ethyl acetate /hexane, 70%. Yield - 80%.

$^1\text{H NMR}$  spectrum in  $\text{CDCl}_3$  (500 MHz):  $\delta = 2.33$  (s, 6H,  $\text{CH}_3\text{COO-}$ ), 3.88 (s, 6H,  $\text{CH}_3\text{O}$ ), 5.86 (s, 1H), 6.56 (d,  $J = 15.6$  Hz, 2H), 7.06 (d,  $J = 8.4$  Hz, 2H), 7.12 (s, 2H), 7.15 (d,  $J = 8.4$  Hz, 2H), 7.61 (d,  $J = 16.0$  Hz, 2H), 15.84 (broad enolic OH).  $^{13}\text{C NMR}$  ( $\text{CDCl}_3$ , 100 MHz) 183.25, 168.9, 151.6, 141.52, 140.10, 134.14, 129.35, 124.45, 123.45, 122.31, 121.22, 111.67, 101.89, 56.809, 20.78; ESI-MS(ES+)m/z:  $[\text{M}^+]$  calcd for  $\text{C}_{24}\text{H}_{27}\text{O}_8$  452.459; found 455.2439.

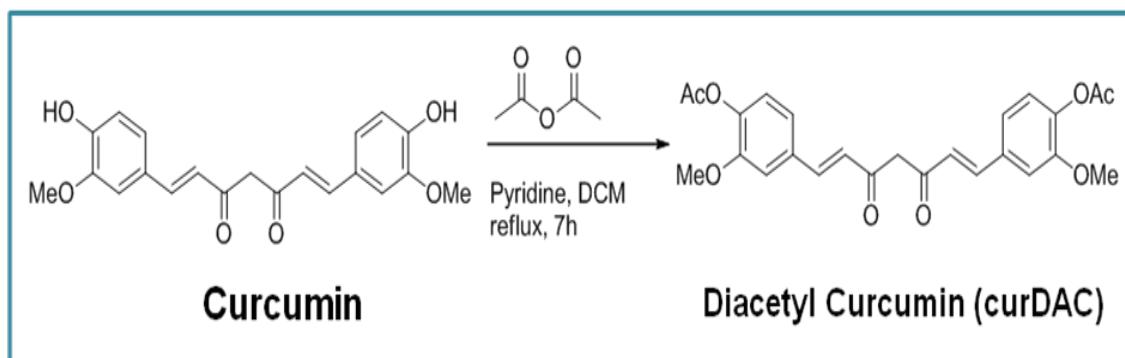

3.  $^1\text{H}$ -NMR of DAC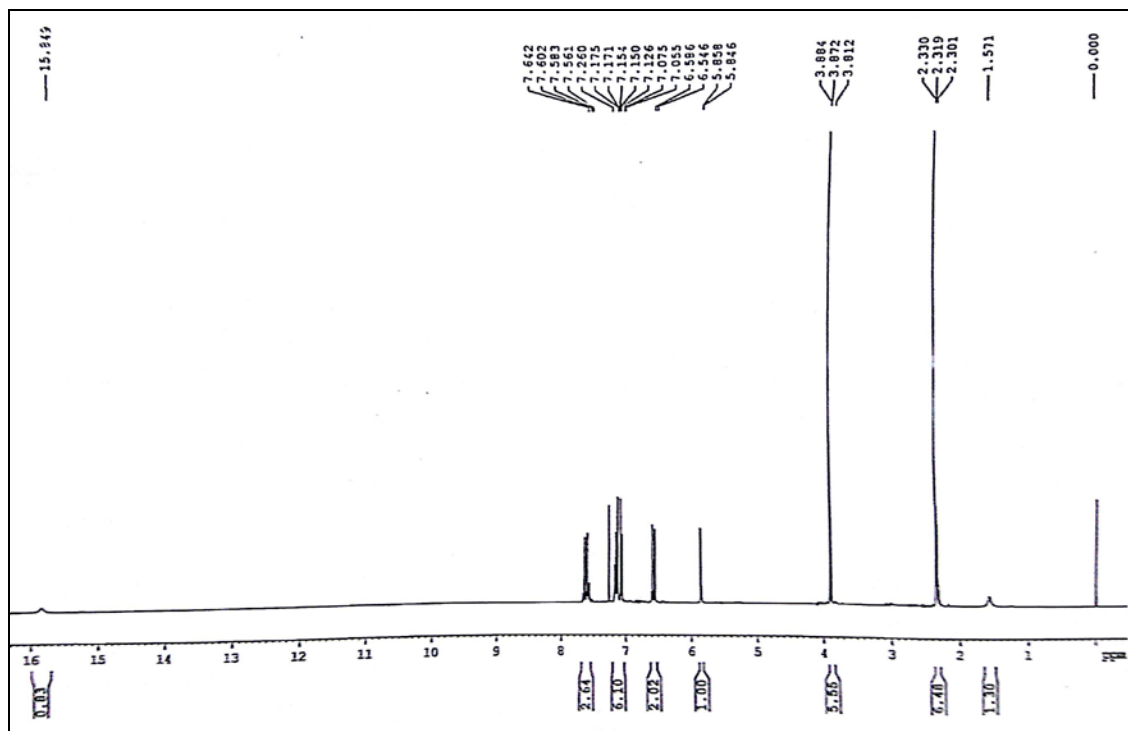4.  $^{13}\text{C}$ -NMR of DAC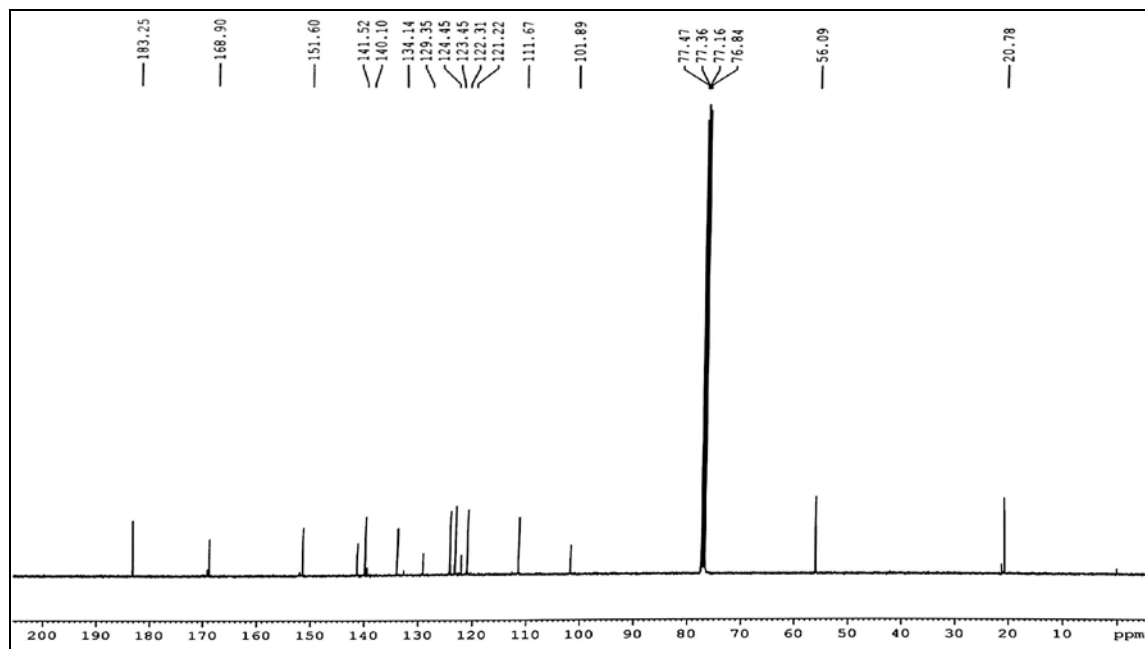

## 5. ESI-MS of DAC

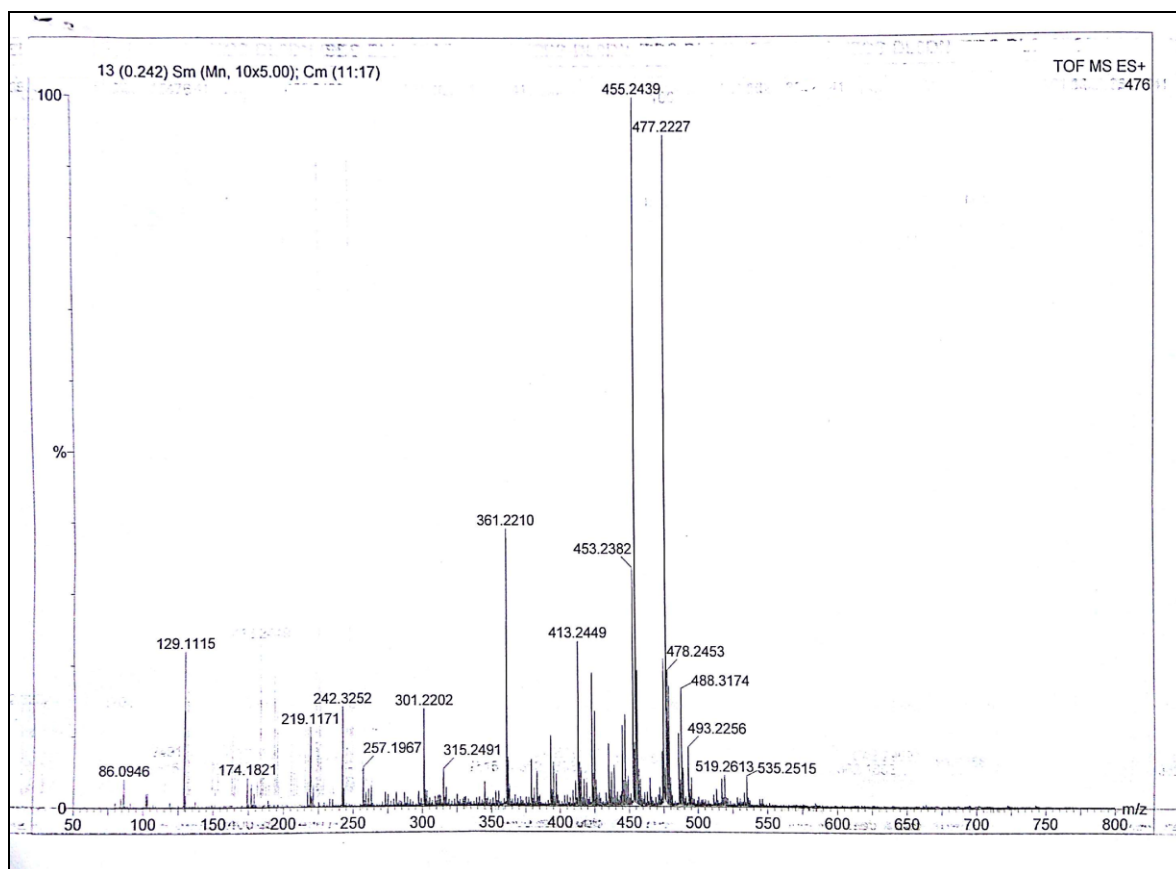

## 6. CD- Calculations

**Table- 1**

Structural integrity of native and incubated  $\beta$ -lg in absence and presence of curcumin derivatives as determined by CDNN 2.1 software.

| Sample                                       | $\alpha$ -helix | $\beta$ -sheet | $\beta$ -turn | Random coil |
|----------------------------------------------|-----------------|----------------|---------------|-------------|
| Native $\beta$ -lg                           | 28.7            | 18.8           | 19.8          | 32.7        |
| $\beta$ -lg (incubated)                      | 16.28           | 29.65          | 17.56         | 36.49       |
| $\beta$ -lg(incubated) with (1:0.5) curcumin | 16.31           | 29.22          | 17.53         | 36.51       |
| $\beta$ -lg(incubated) with (1:1) curcumin   | 16.45           | 29.09          | 17.52         | 37.45       |
| $\beta$ -lg(incubated) with (1:0.5 )DAC      | 16.89           | 28.09          | 16.35         | 39.35       |
| $\beta$ -lg(incubated) with (1:1 )DAC        | 17.01           | 27. 57         | 16.1          | 39.86       |
| $\beta$ -lg(incubated) with (1:0.5 ) IOC     | 17.56           | 26.63          | 16.01         | 40.29       |
| $\beta$ -lg(incubated) with (1:1 )IOC        | 18.74           | 25.36          | 15.69         | 41.1        |
| $\beta$ -lg(incubated) with (1:0.5 )PY       | 19.57           | 24.7           | 14.7          | 41.4        |
| $\beta$ -lg(incubated) with (1:1) PY         | 22.78           | 22.54          | 13.67         | 41.99       |

---

## 7. References:

1. S. Maity, S. Pal, S. Sardar, N. Sepay, H. Parvej, J. Chakraborty and U. C. Halder, RSC Adv., 2016, **6**, 112175.
